# Supplementary material for: NHP BurkPx: A multiplex serodiagnostic bead assay to monitor Burkholderia pseudomallei exposures in non-human primates
Source: PLoS Negl Trop Dis. 2023 Feb 8;17(2):e0011067. doi: 10.1371/journal.pntd.0011067 (PMC9907805; doi:10.1371/journal.pntd.0011067)
Supplement: S4 Table — (XLSX) [file pntd.0011067.s007.xlsx]

## Sheet: Sheet1
Isotype	Group 1	Group 2	Sample size	Permutations	pseudo-F	p-value	q-value
	-7	Negative	126	999	7.28025	0.001	0.001556
IgM	1-6	Negative	84	999	1.62339	0.179	0.179
	7	Negative	78	999	55.3678	0.001	0.00155556
	8-13	Negative	55	999	84.1259	0.001	0.00155556
	14	Negative	66	999	180.311	0.001	0.00155556
	15-27	Negative	49	999	266.265	0.002	0.00294737
	28	Negative	65	999	243.193	0.001	0.00155556
IgG	-7	Negative	126	999	1.81827	0.148	0.153481
	1-6	Negative	84	999	2.24792	0.095	0.102308
	7	Negative	78	999	14.109	0.001	0.00155556
	8-13	Negative	55	999	19.6935	0.001	0.00155556
	14	Negative	66	999	72.1444	0.001	0.00155556
	15-27	Negative	49	999	223.417	0.001	0.00155556
	28	Negative	65	999	129.434	0.001	0.00155556
